# Supplementary material for: Volatile Aroma Compounds of Brandy ‘Lozovača′ Produced from Muscat Table Grapevine Cultivars (Vitis vinifera L.)
Source: MDPI journal article supplement (doi:10.3390/molecules24132485), 2019-07-06
Supplement: s1 [file s1]

## Supplementary Materials

Article

# Volatile Aroma Compounds of Brandy ‘Lozovača’ Produced from Muscat Table Grapevine Cultivars (*Vitis vinifera* L.)

Saša Matijašević <sup>1,\*</sup>, Jelena Popović-Djordjević <sup>2,\*</sup>, Renata Ristić <sup>3</sup>, Dušica Ćirković <sup>4</sup>, Bratislav Ćirković <sup>5</sup> and Tatjana Popović <sup>6</sup>

<sup>1</sup> University of Belgrade, Faculty of Agriculture, Department of Horticulture, Nemanjina 6, 11080 Belgrade, Serbia

<sup>2</sup> University of Belgrade, Faculty of Agriculture, Department of Food Technology and Biochemistry, Nemanjina 6, 11080 Belgrade, Serbia

<sup>3</sup> University of Adelaide, ARC Training Centre for Innovative Wine Production, School of Agriculture, Food and Wine, PMB 1, Glen Osmond, SA 5064, Australia

<sup>4</sup> College of Agriculture and Food Technology, Ćirila i Metodija 1, 18400 Prokuplje, Serbia

<sup>5</sup> University of Priština, Faculty of Agriculture, Kopaonička bb, 38219 Lešak, Serbia

<sup>6</sup> University of Montenegro, Faculty of Biotechnology, Mihaila Lalića 1, 81000 Podgorica, Montenegro

\* Correspondence: sasam@agrif.bg.ac.rs (S.M.); jelenadj@agrif.bg.ac.rs (J.P.-D.); Tel.: +38-111-441-3351 (S.M.); +38-111-441-3142 (J.P.-D.)

## Supplementary Tables

**Table S1.** Compounds identified in grape brandies produced from Muscat table grape cultivars and their aroma descriptors

| Class     | Compound                 | Aroma descriptor                                                                             |
|-----------|--------------------------|----------------------------------------------------------------------------------------------|
| Alcohol   | 1-Hexanol                | Flower [27, 29, 40], green [27, 29, 40], cut grass [29, 40], grass [27], herbaceous [23, 27] |
|           | Phenyl-ethyl alcohol     | Floral [27, 40], rose [27,40], honey [27]                                                    |
|           | 1-Heptanol               | Oily [40]                                                                                    |
| Acid      | Octanoic acid            | Rancid [23], cheese [23, 40] fatty [40], sweet [40]                                          |
|           | Hexadecanoic acid        | Rancid [23], cheese [25], fatty [25], sweet [40]                                             |
| Ester     | Ethyl hexanoate          | Fruity[23,25], green apple [25, 29, 40], banana [23,25], wine-like [23,25], brandy [25]      |
|           | Ethyl octanoate          | Sweet [23, 40], floral [23], fruity [23, 40], banana [23], pear ]23], brandy [23]            |
|           | Ethyl decanoate          | Fruity, brandy, grape [37]                                                                   |
| Terpenoid | $\alpha$ -Pinene         | Pine, resinous [31]                                                                          |
|           | Limonene                 | Fruity, lemon [41]                                                                           |
|           | $\gamma$ -terpinene      | Fruity, lemon-like [31]                                                                      |
|           | <i>c</i> -Linalool oxide | Floral [40]                                                                                  |
|           | <i>t</i> -Linalool oxide | Woody, floral [40]                                                                           |
|           | Rose oxide               | Floral [24], lychee-like [24], rose [37]                                                     |
|           | Linalool                 | Roses, anise seed, grapefruit, green lemon and citrus [15,41]                                |
|           | Hotrienol                | Fresh, floral, fruity [15,41]                                                                |
|           | Citronellol              | Roses, anise seed, grapefruit, green lemon and citrus [15,41]                                |

## Supplementary Figures

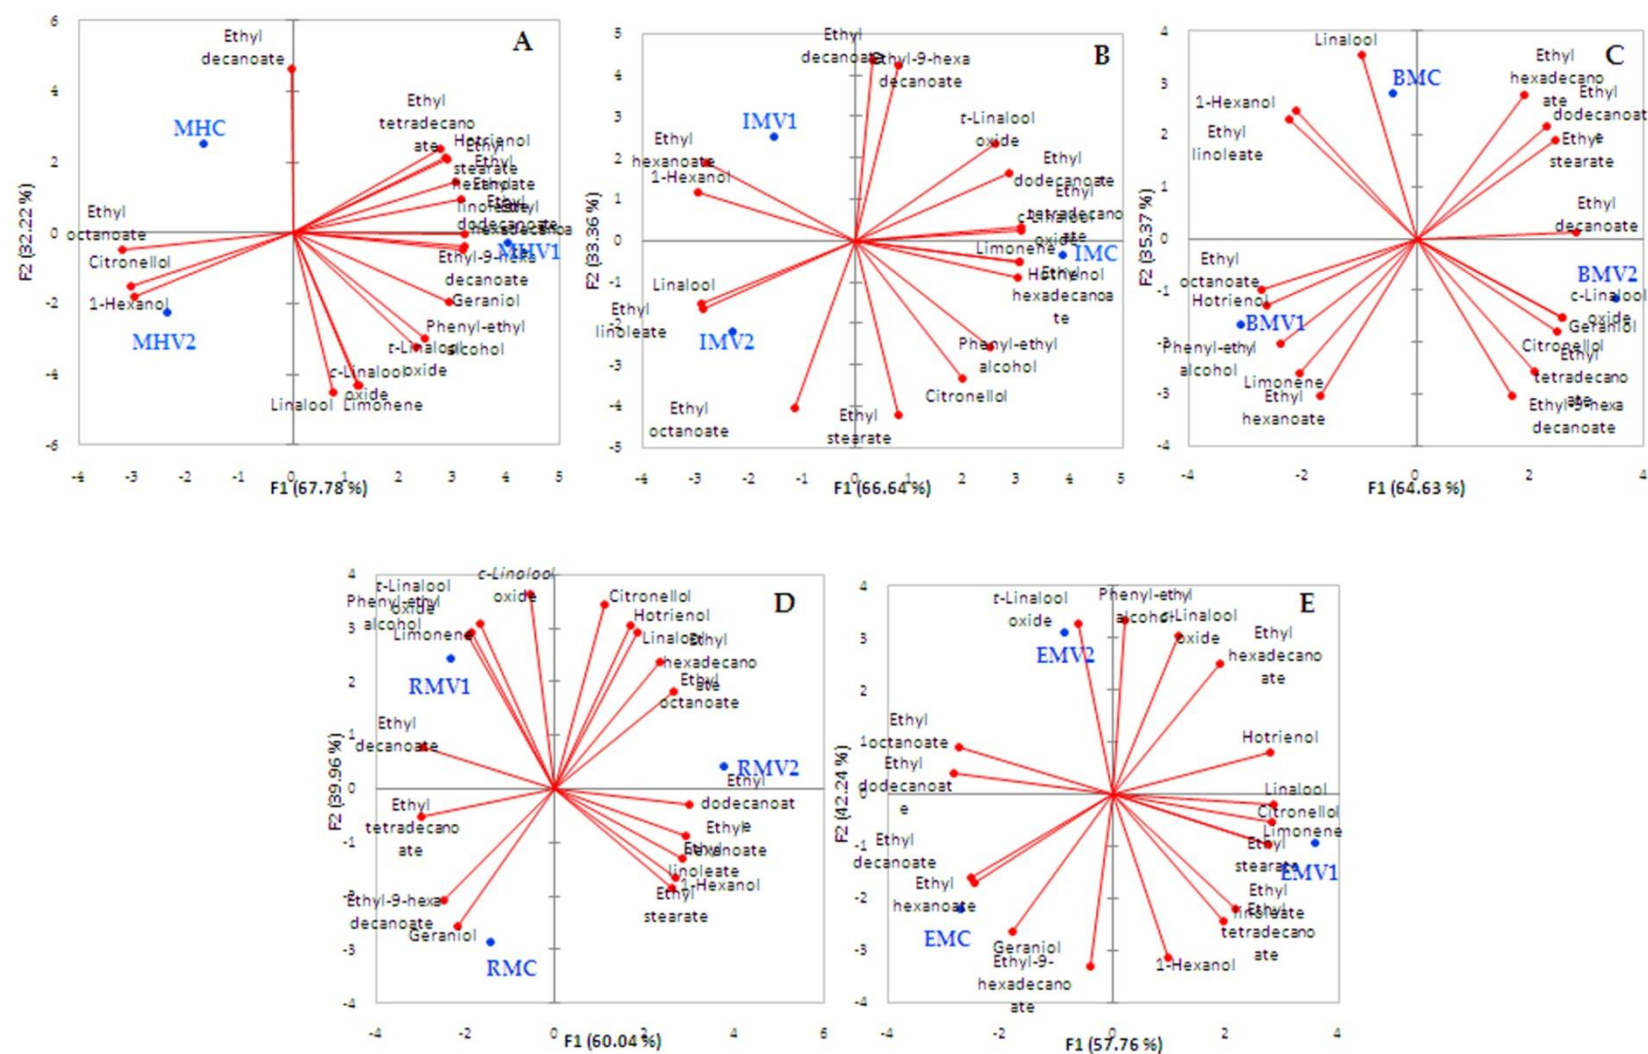

Figure S1. Biplots of the volatile aroma compounds identified in grape brandy samples of each Muscat cultivar.

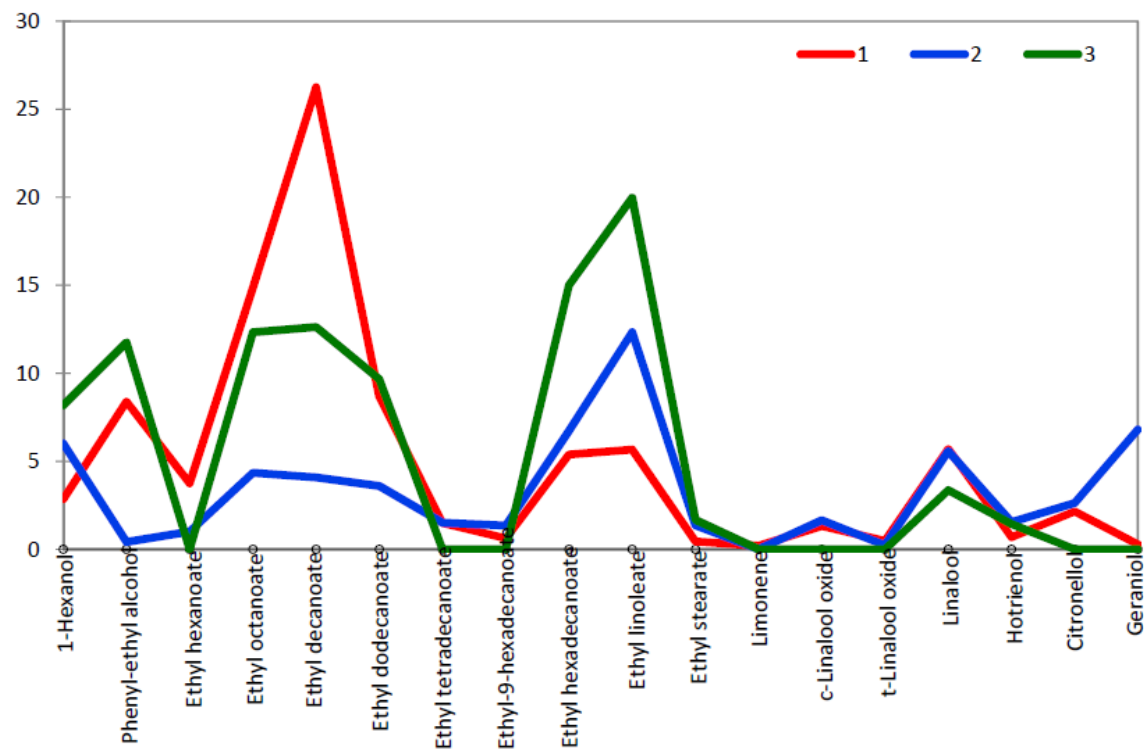

**Figure S2.** Profile plot showing volatile composition of clusters 1-3 obtained by agglomerative hierarchal clustering analysis of samples without enzyme treatment (control)

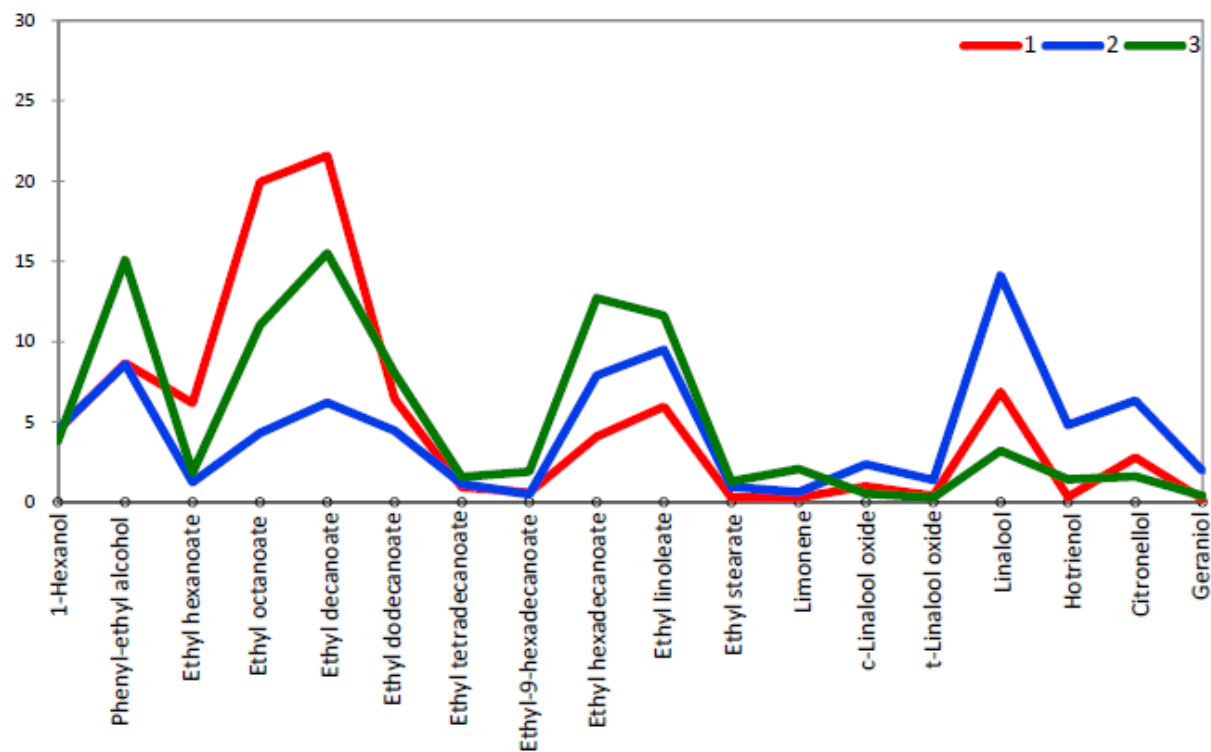

**Figure S3.** Profile plot showing volatile composition of clusters 1-3 obtained by agglomerative hierarchal clustering analysis of all samples with and without enzyme treatment

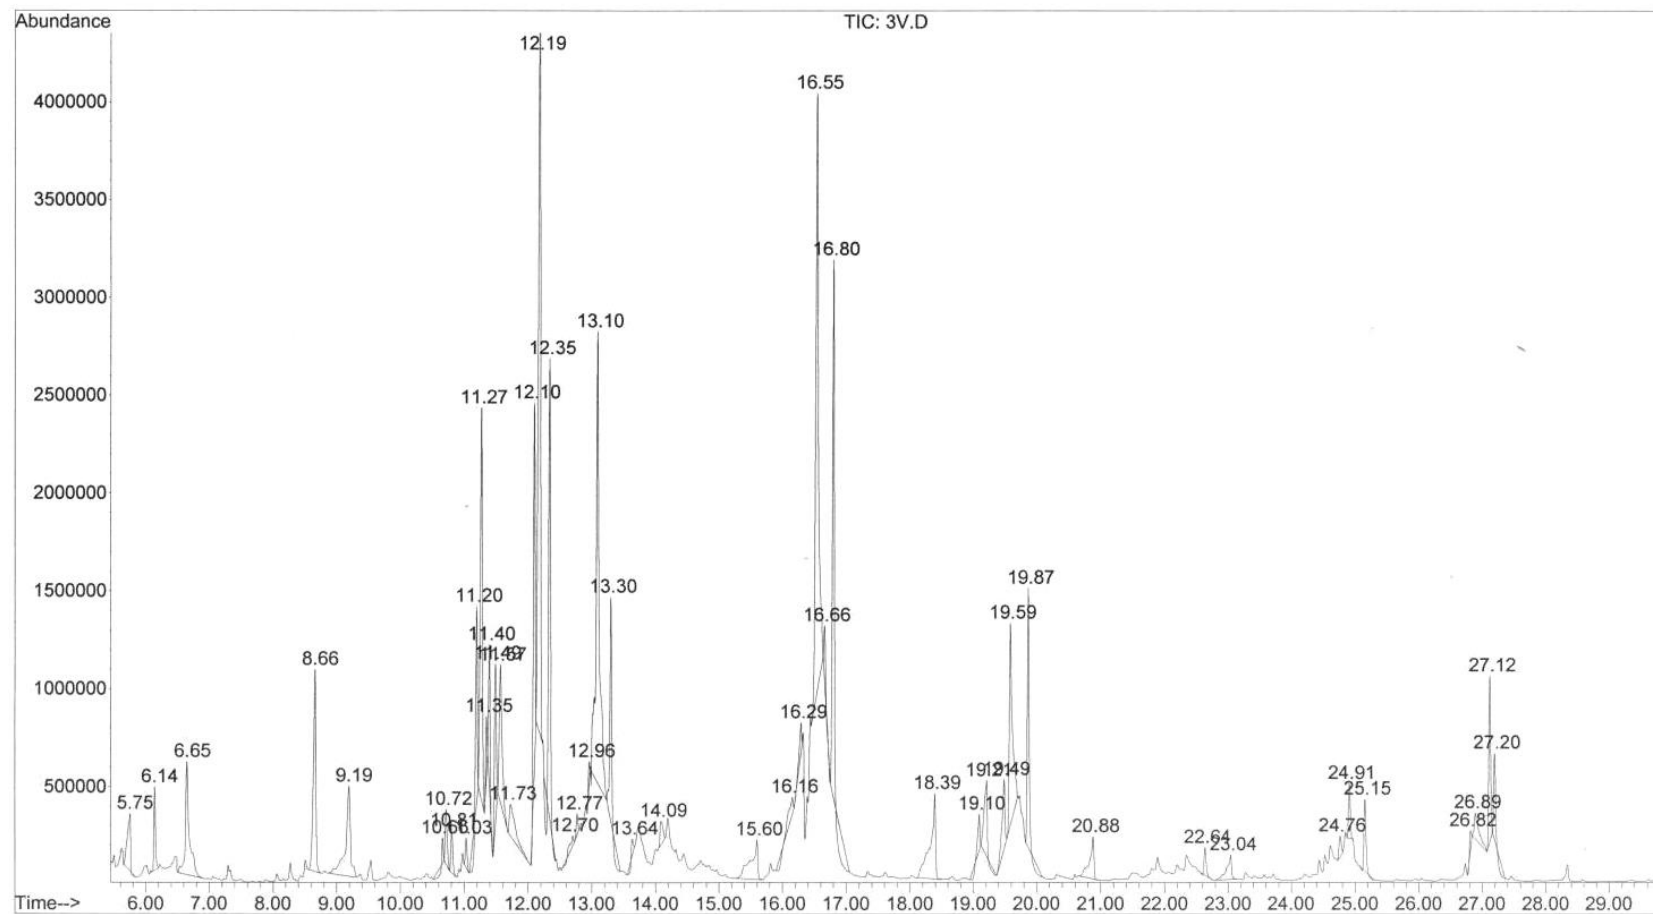

**Figure S4.** Chromatogram of the volatile aromatic compounds in Early Muscat grape brandy control - EMC

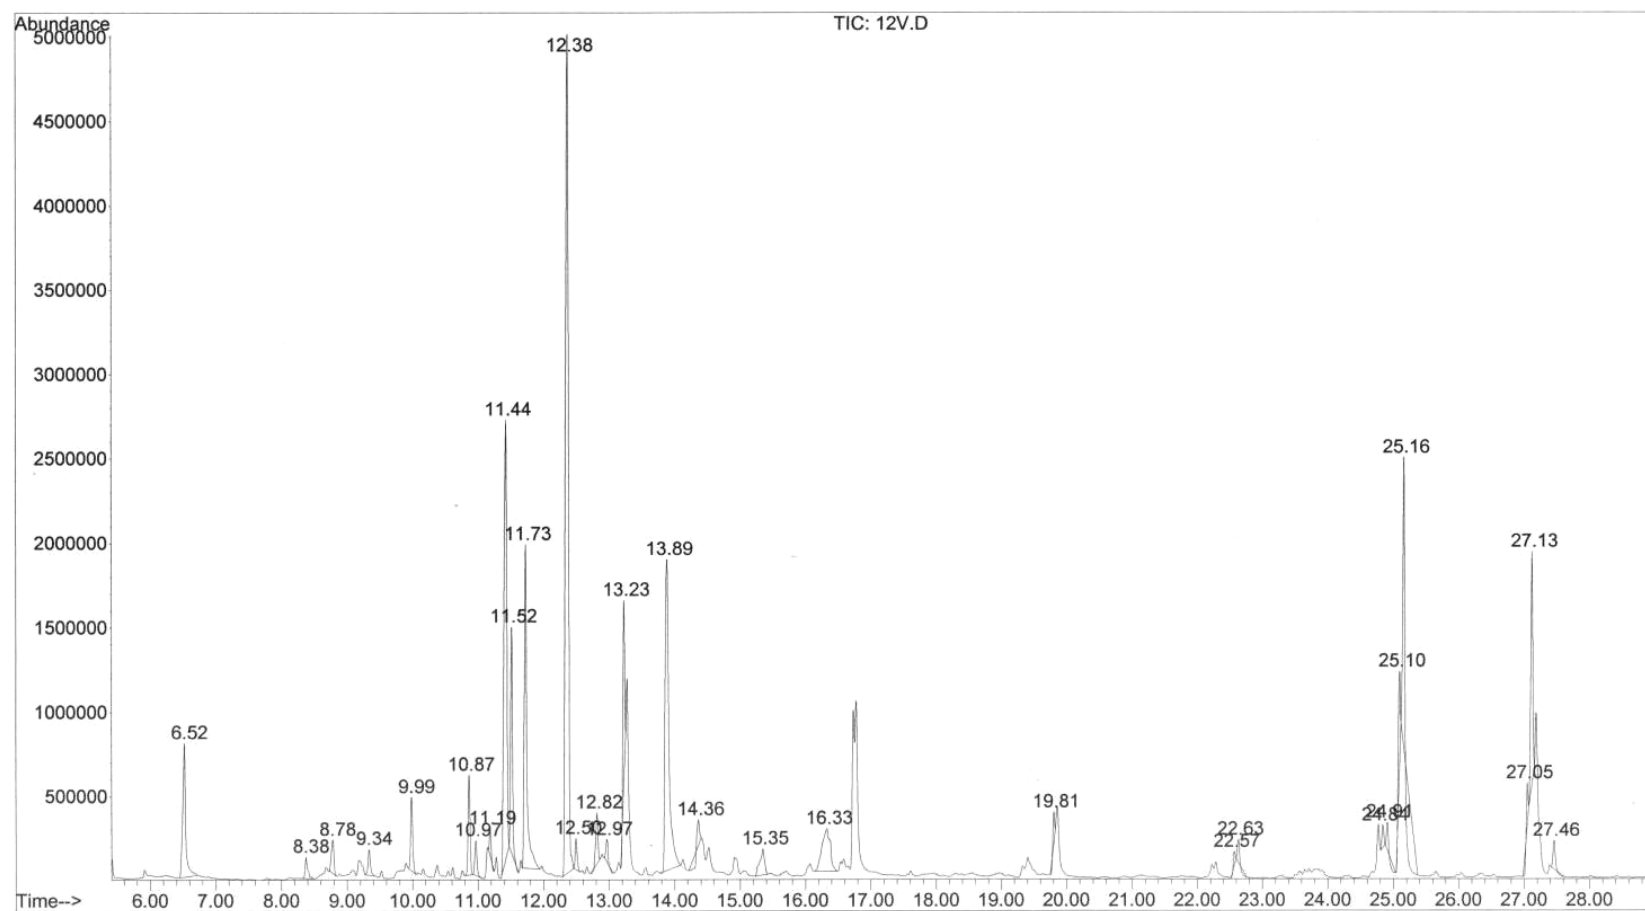

**Figure S5.** Chromatogram of volatile aromatic compounds in Early Muscat grape brandy with the addition of pectolytic enzyme - EMV1

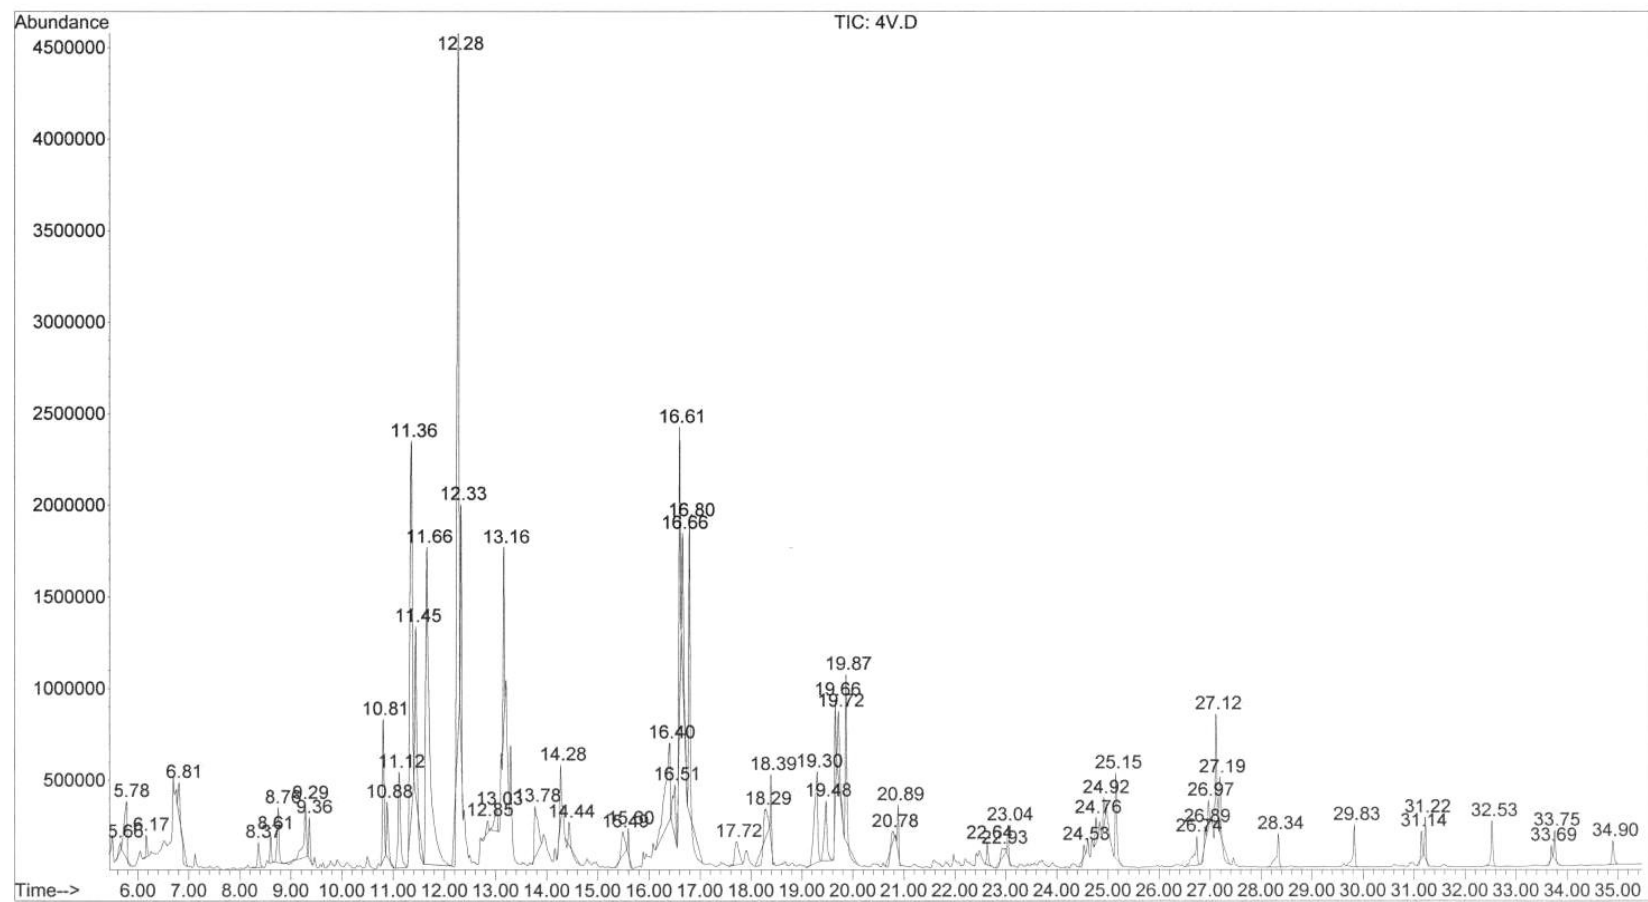

**Figure S6.** Chromatogram of volatile aromatic compounds in Early Muscat grape brandy with the addition of pectolytic enzyme – EMV2



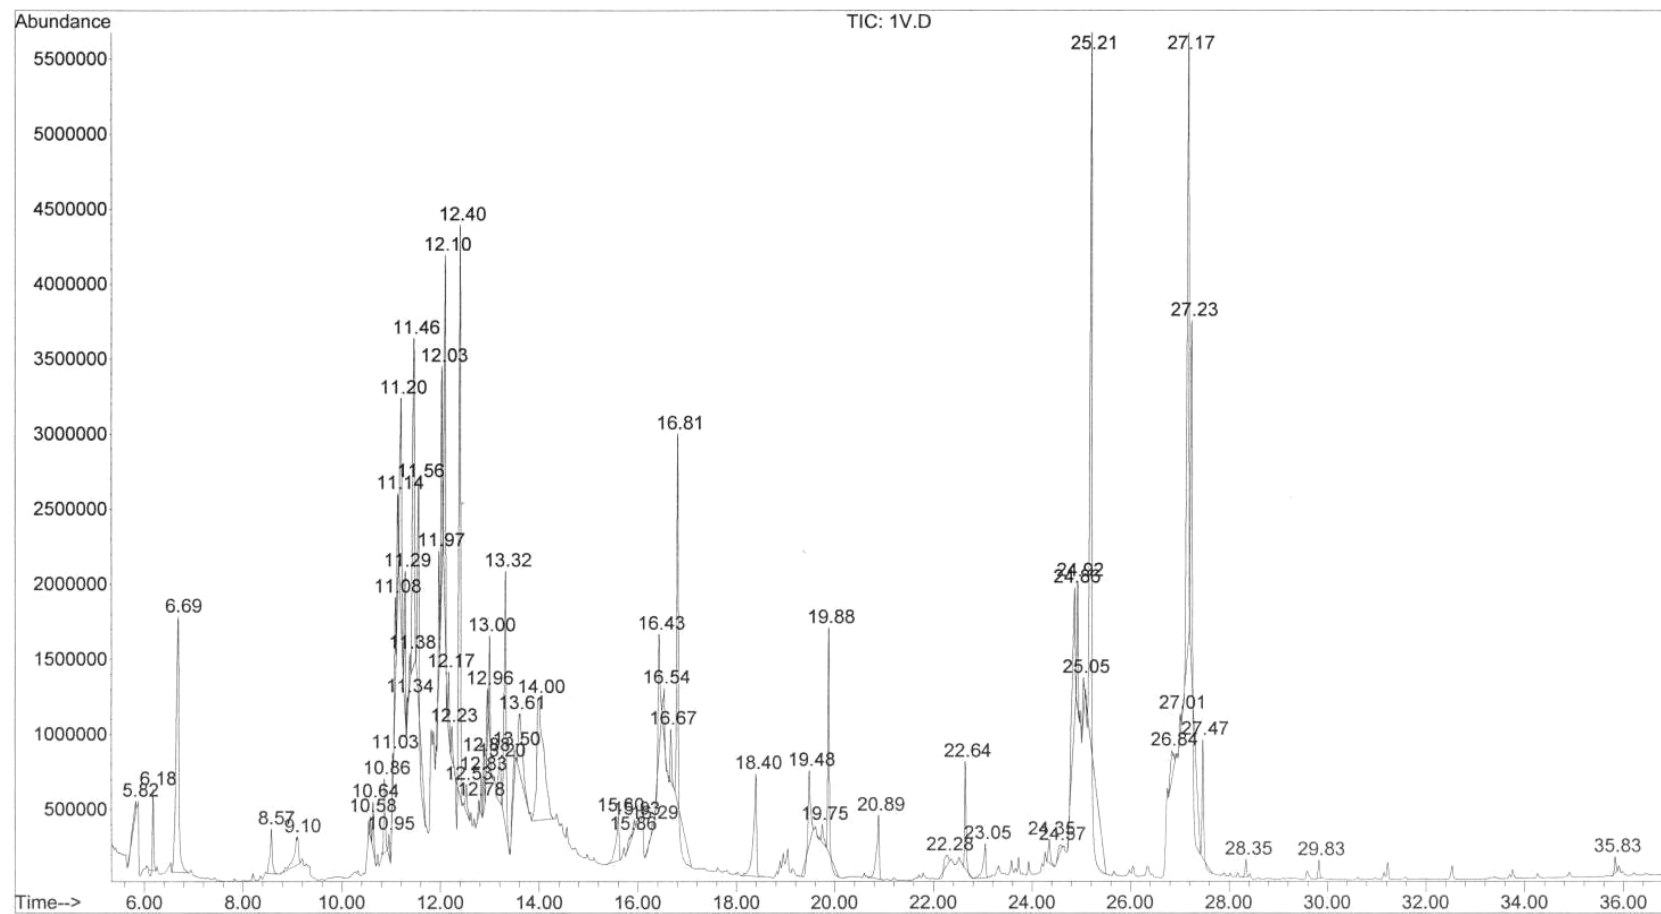

**Figure S7.** Chromatogram of volatile aromatic compounds in Radmilovac Muscat grape brandy control - RMC

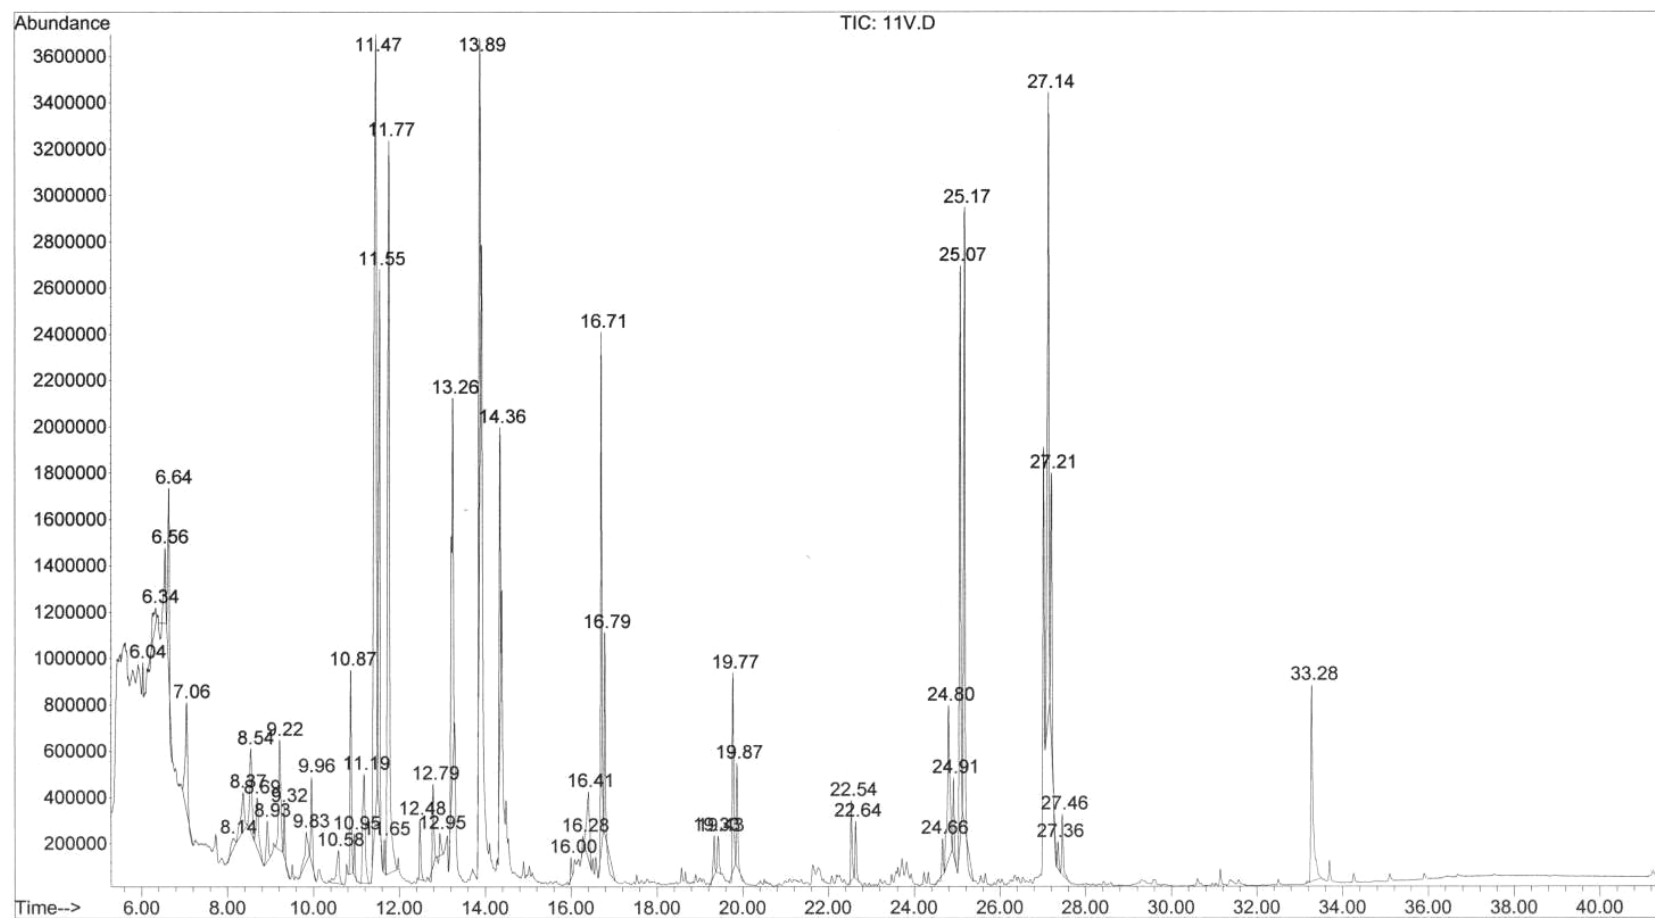

**Figure S8.** Chromatogram of volatile aromatic compounds in Radmilovac Muscat grape brandy with the addition of pectolytic enzyme - RMV1

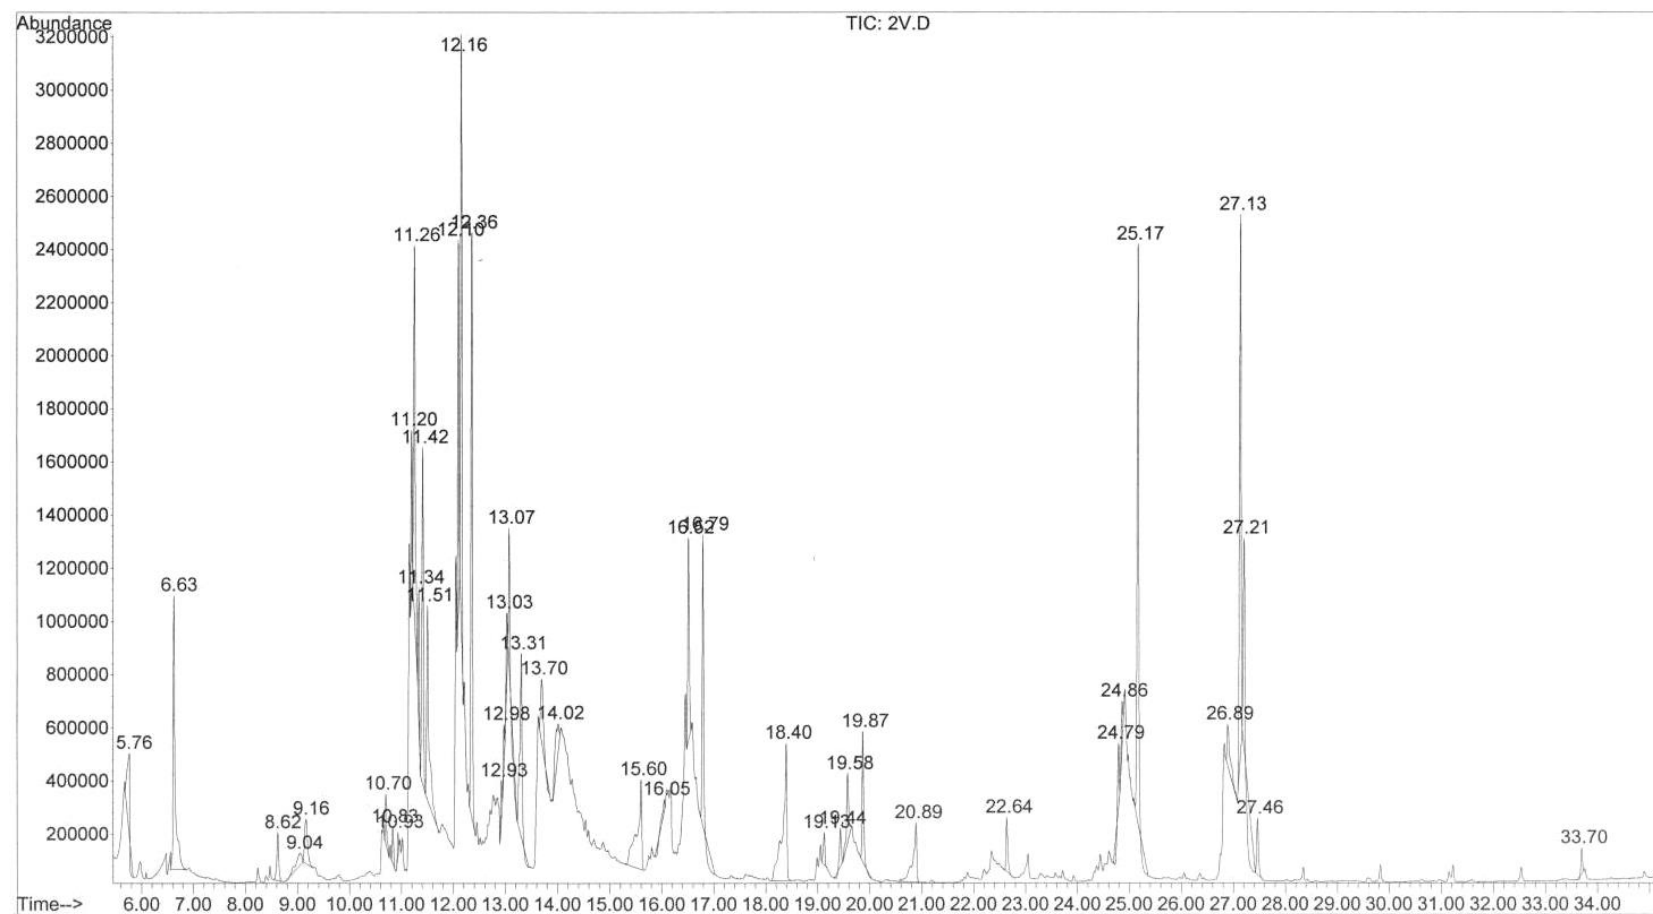

**Figure S9.** Chromatogram of volatile aromatic compounds in Radmilovac Muscat grape brandy with the addition of pectolytic enzyme – RMV2

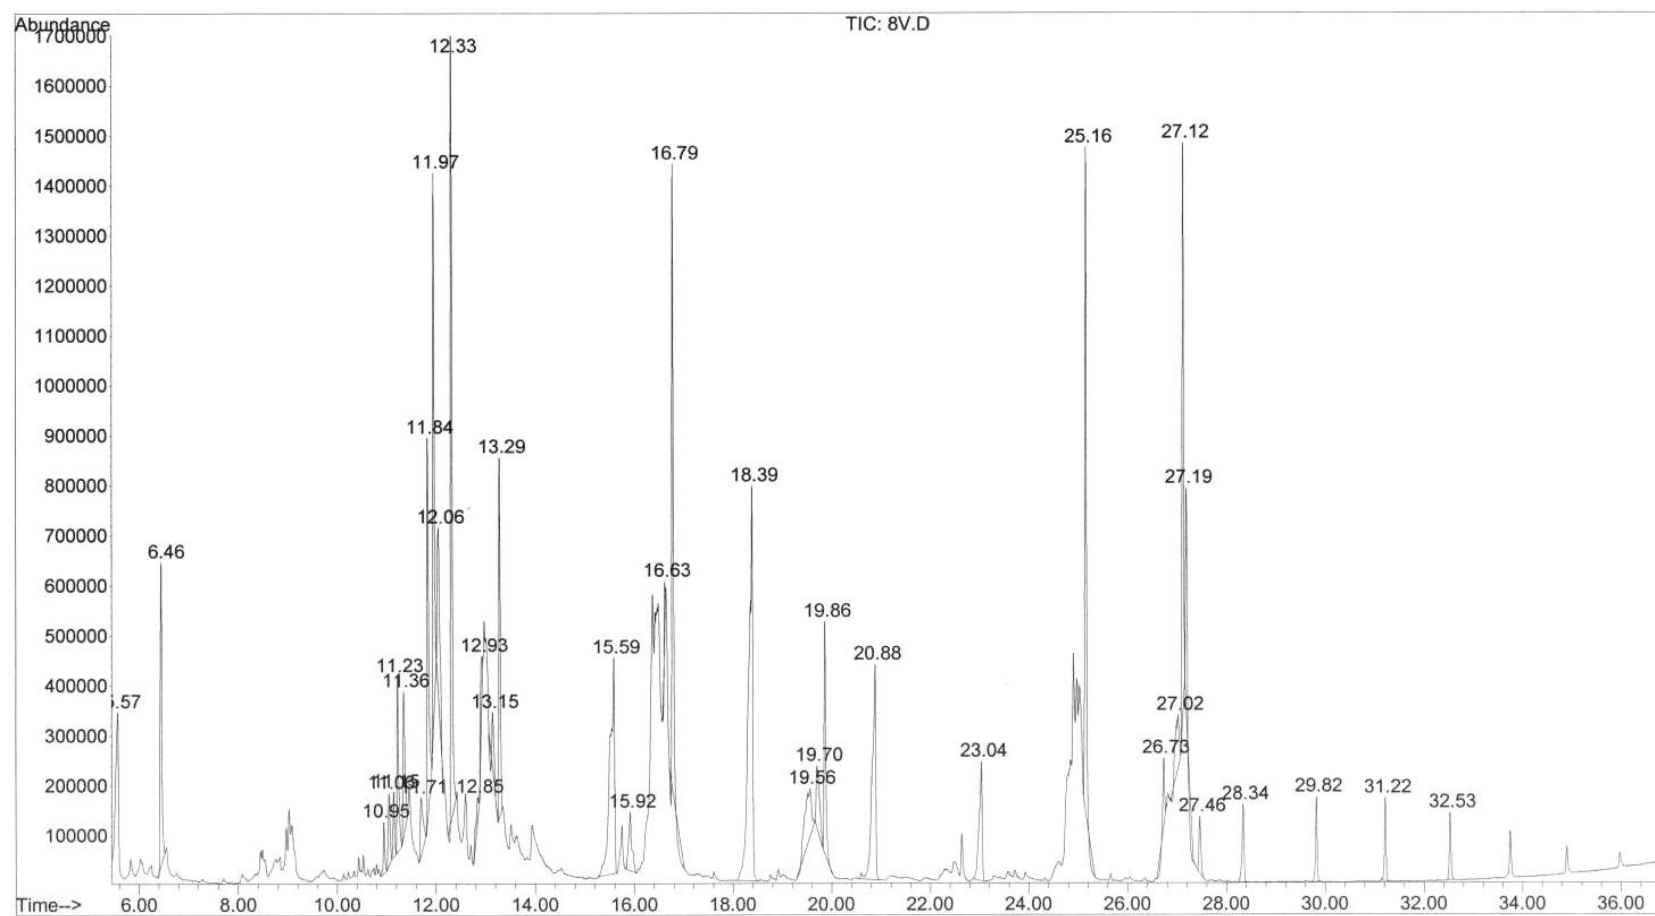

**Figure S10.** Chromatogram of volatile aromatic compounds in Banat Muscat grape brandy control - BMC

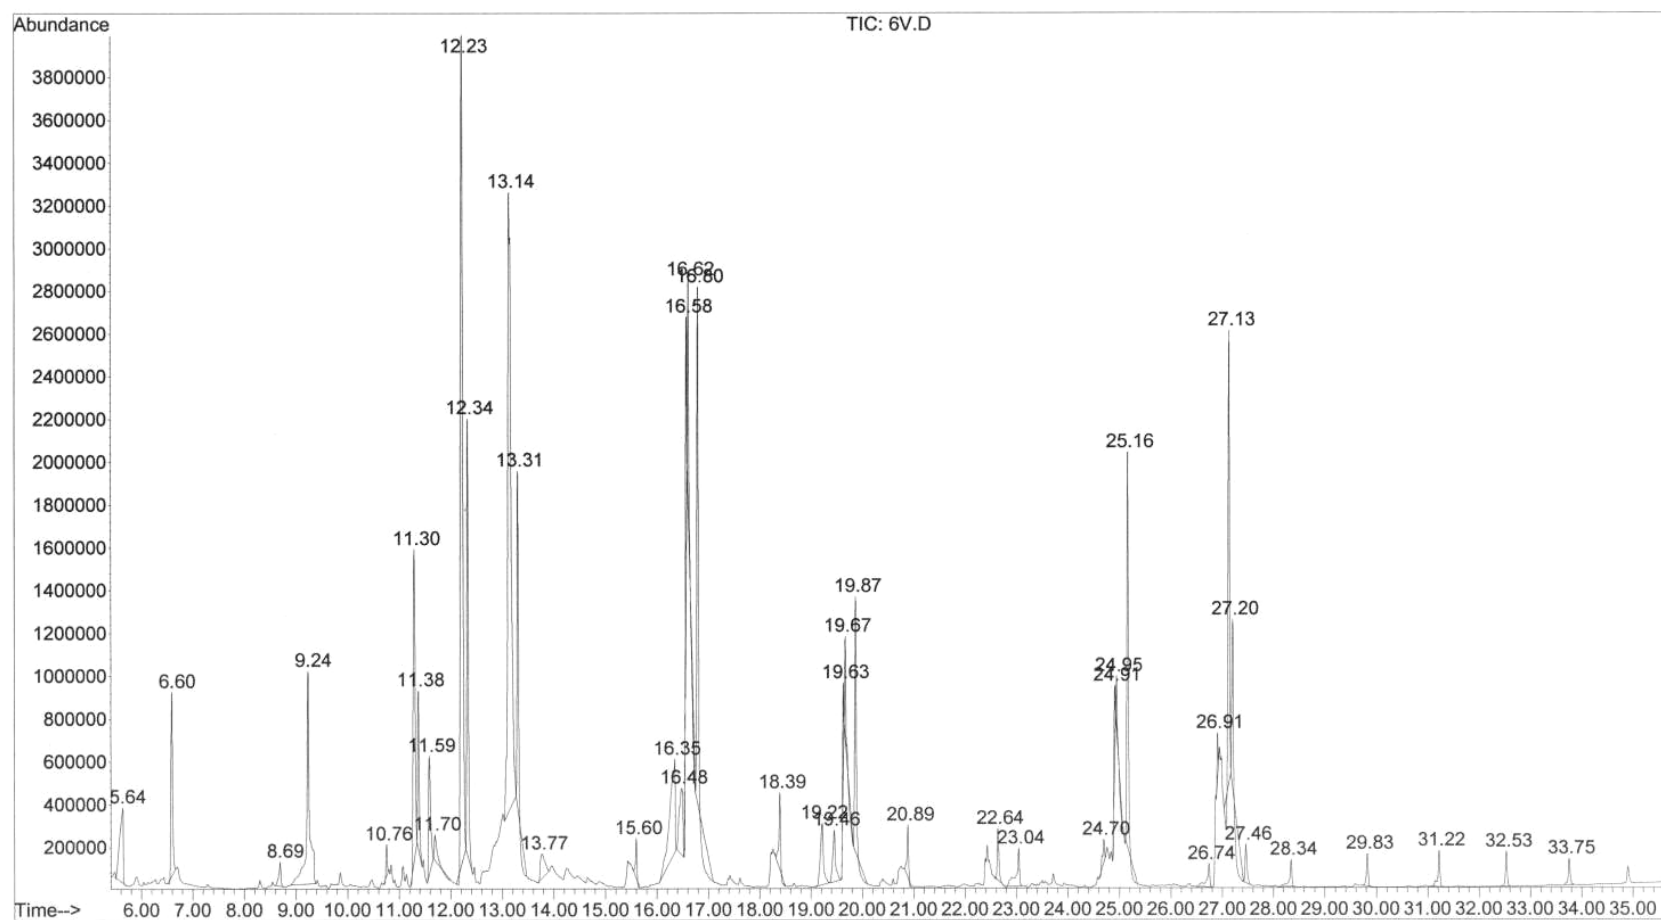

**Figure S11.** Chromatogram of the volatile aromatic compounds in Banat Muscat grape brandy with the addition of pectolytic enzyme - BMV1

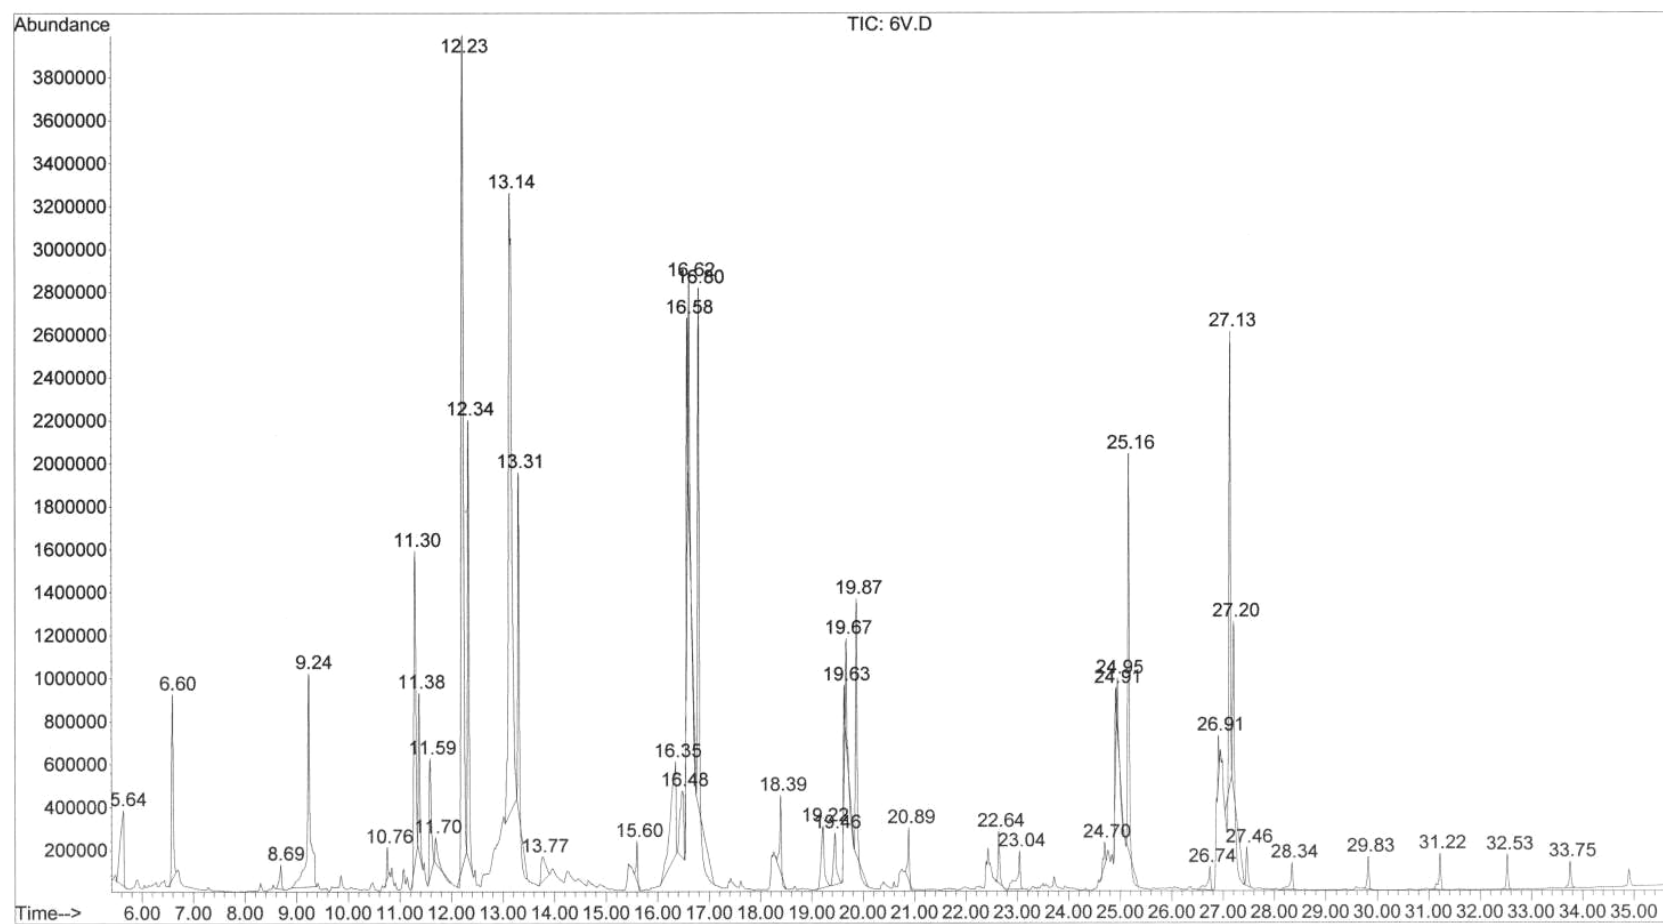

**Figure S12.** Chromatogram of volatile aromatic compounds in Banat Muscat grape brandy with the addition of pectolytic enzyme – BMV2

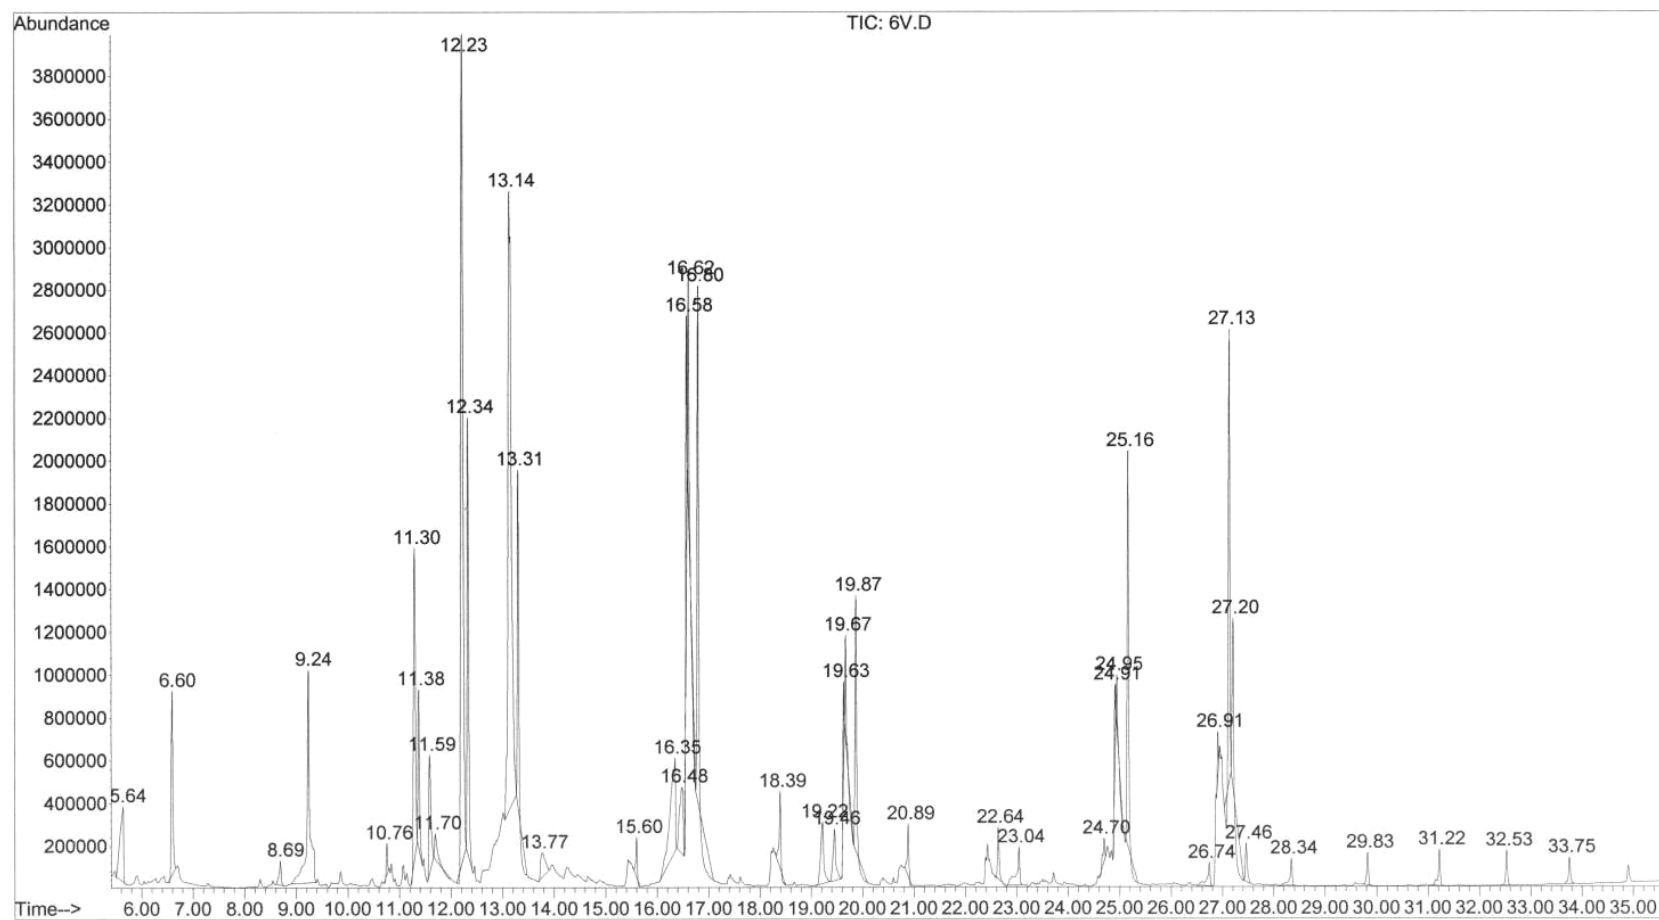

**Figure S13.** Chromatogram of volatile aromatic compounds in Italia Muscat grape brandy control - IMC

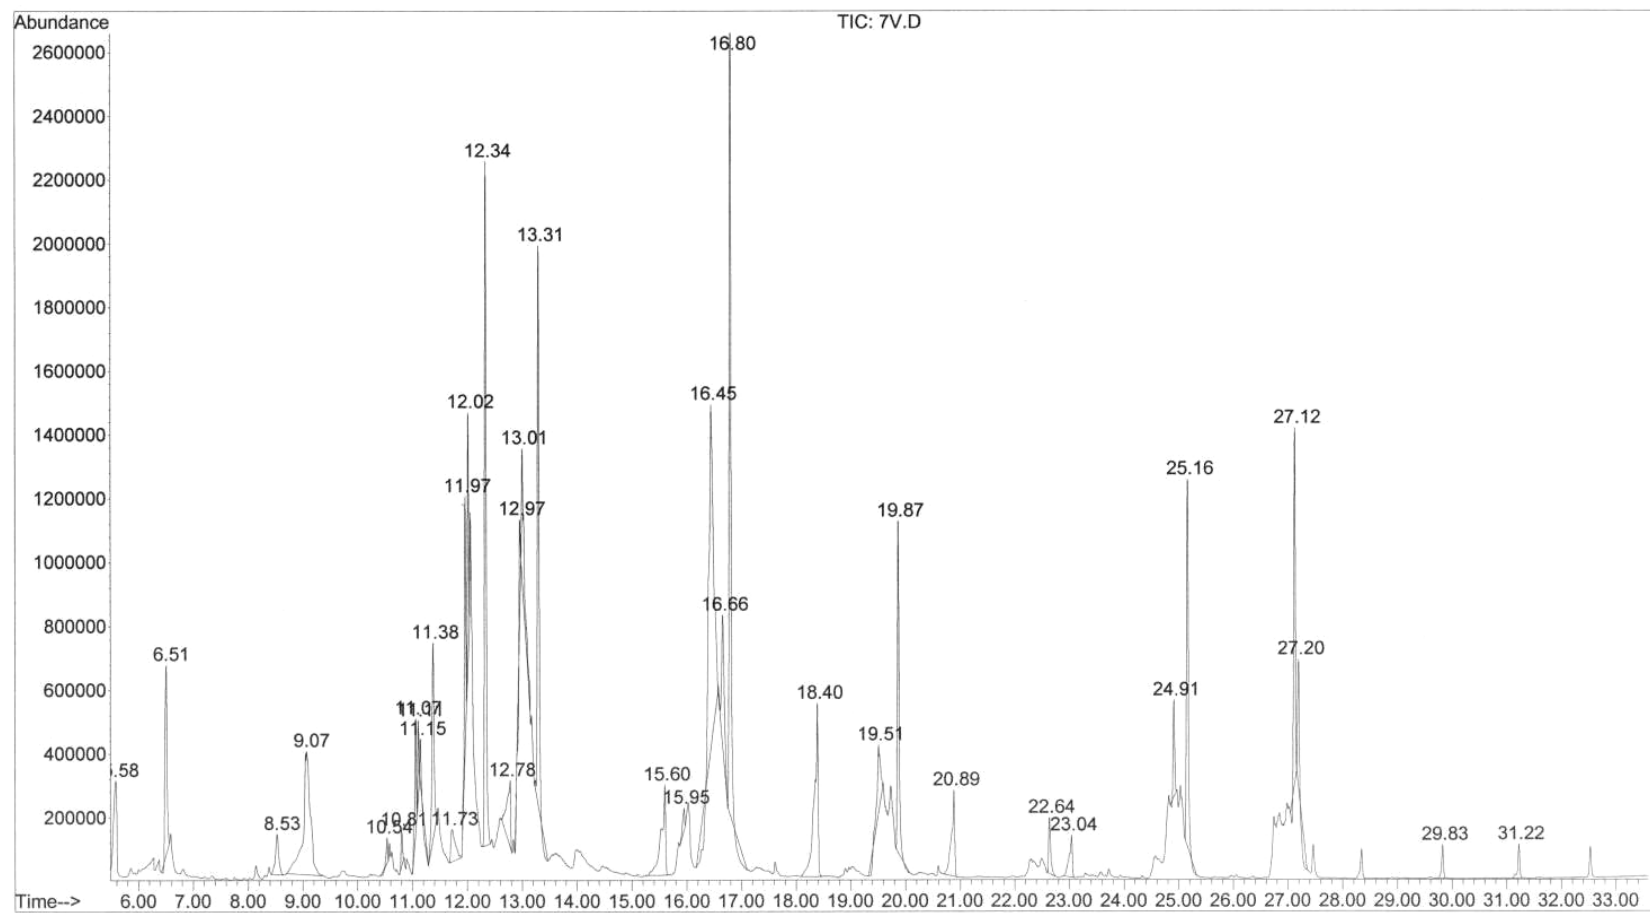

**Figure S14.** Chromatogram of volatile aromatic compounds in Italia Muscat grape brandy with the addition of pectolytic enzyme – IMV1



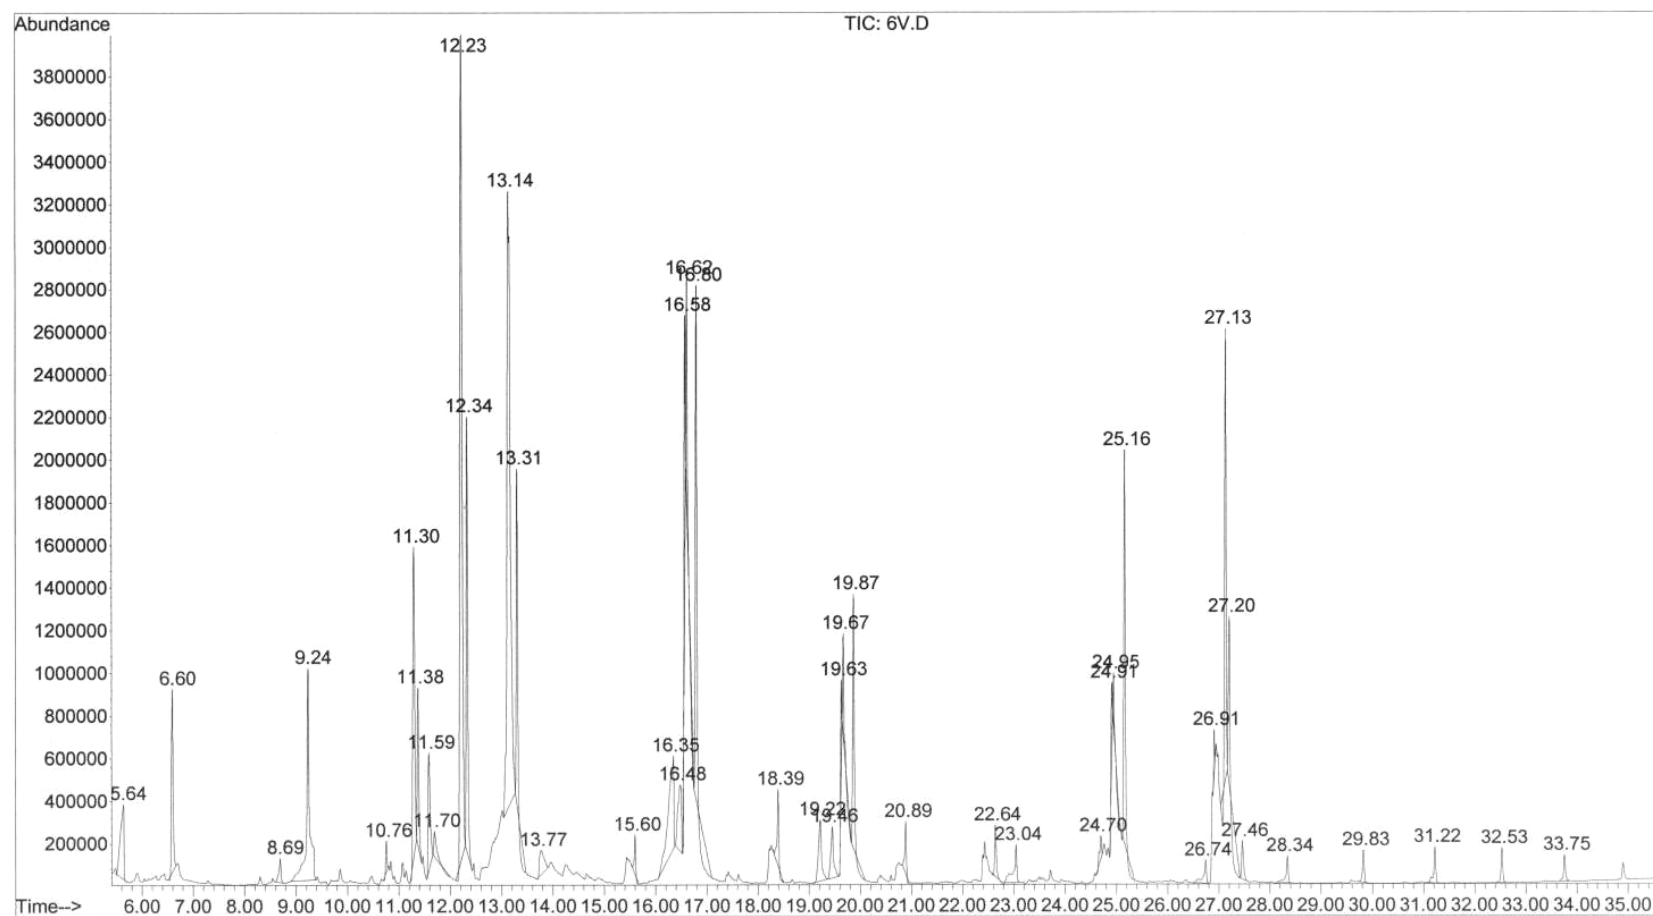

**Figure S15.** Chromatogram of volatile aromatic compounds in Italia Muscat grape brandy with the addition of pectolytic enzyme – IMV2

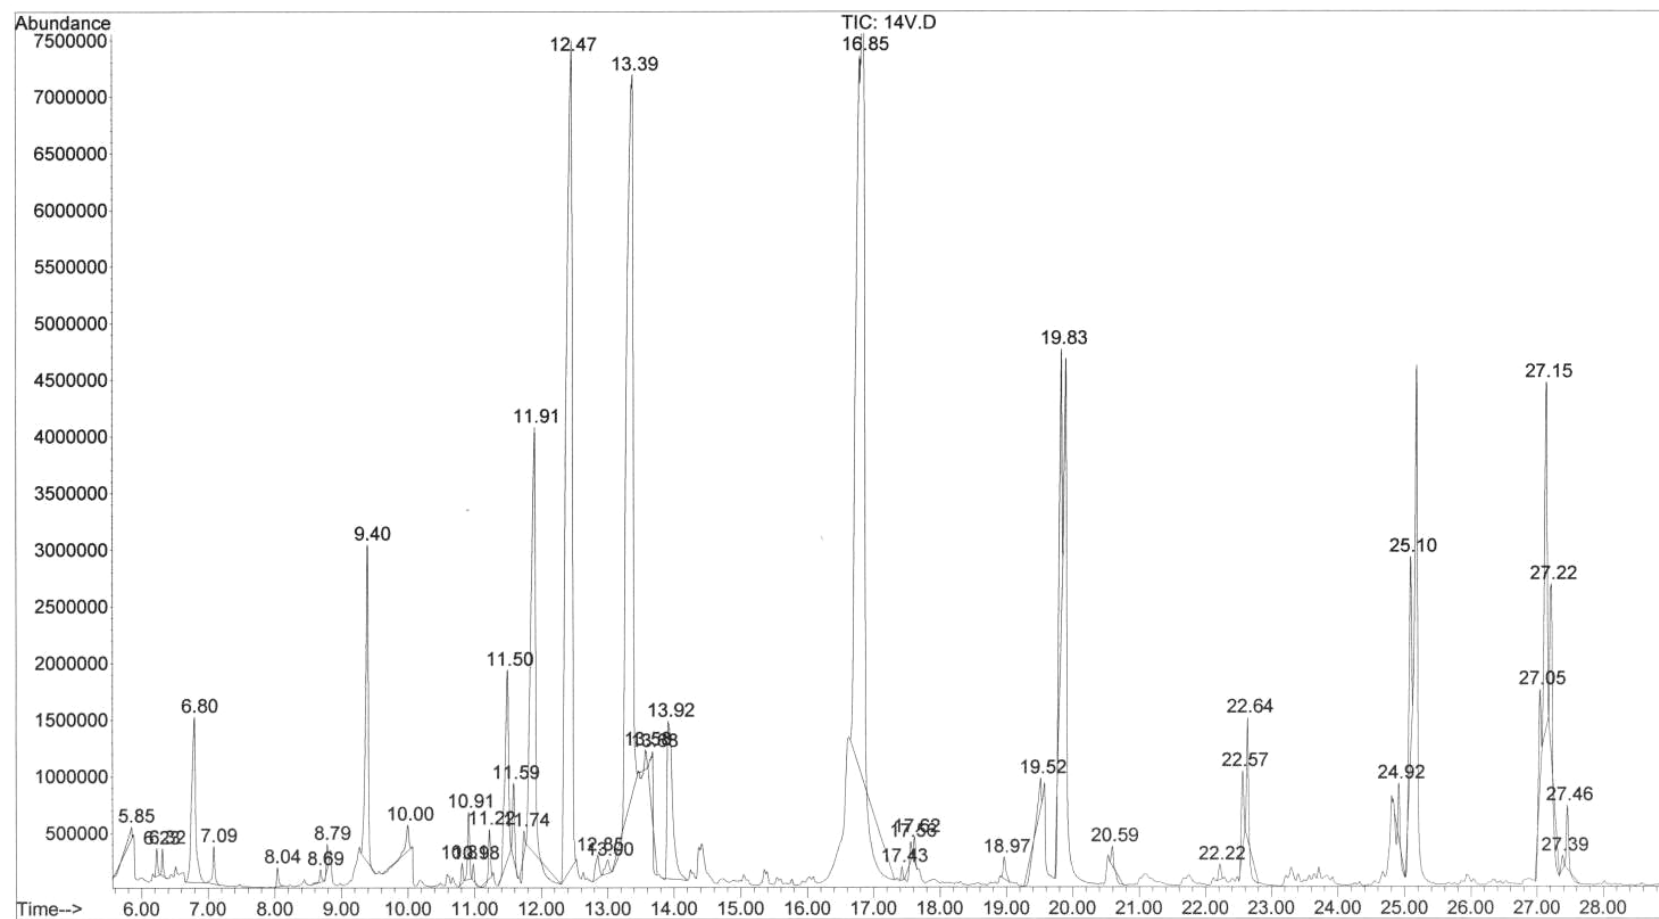

**Figure S16.** Chromatogram of volatile aromatic compounds in Muscat Hamburg grape brandy control – MHC

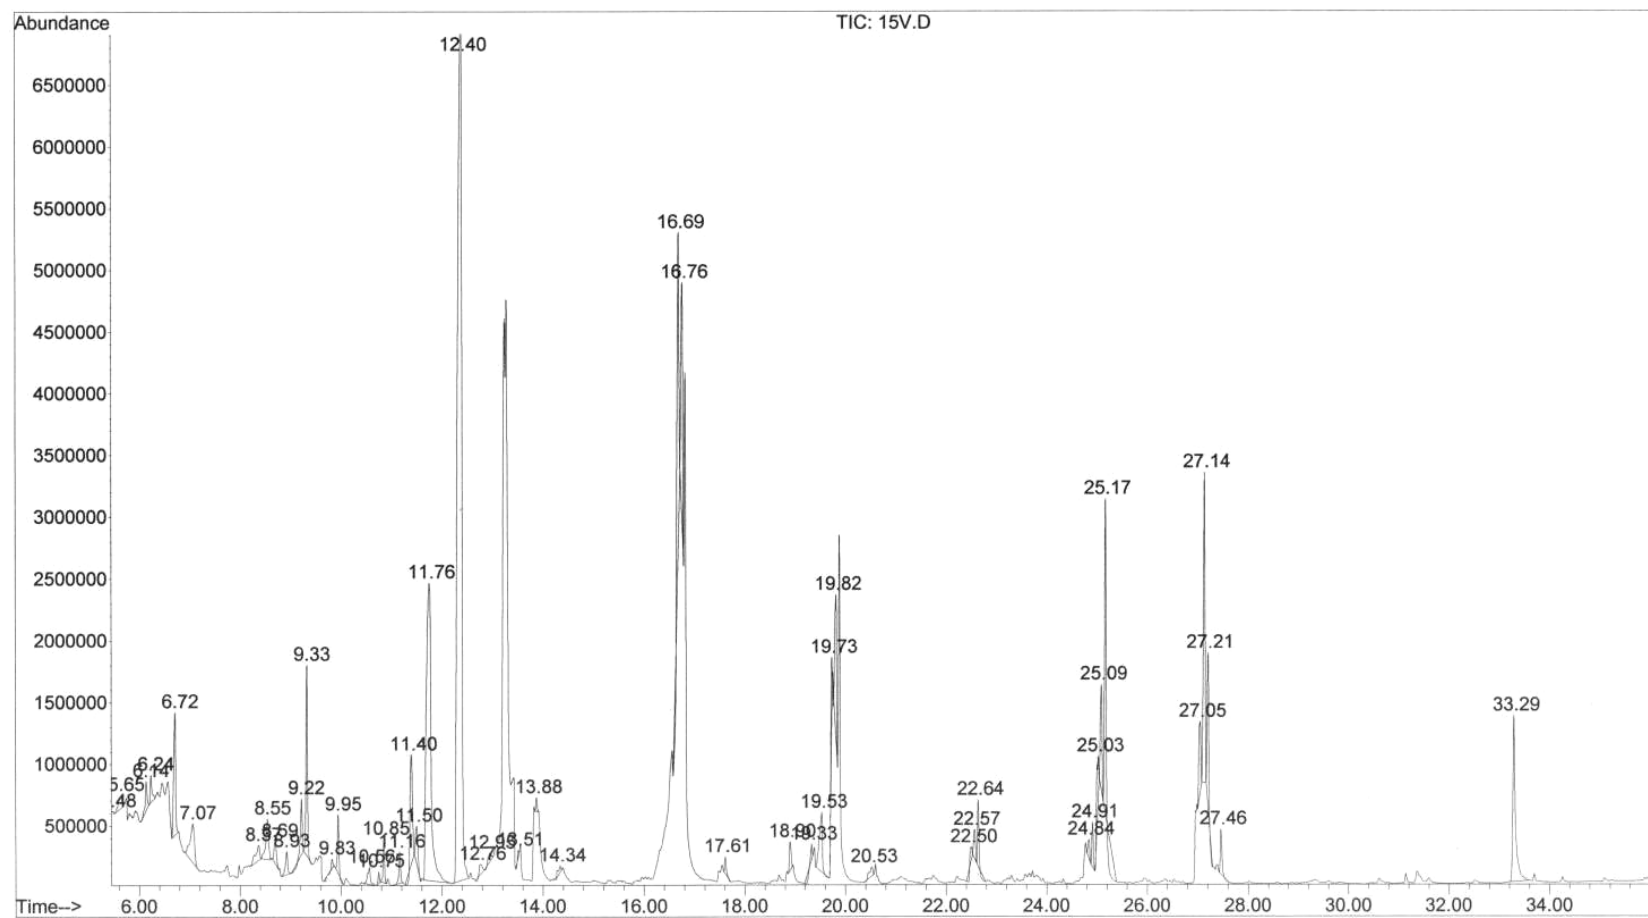

**Figure S17.** Chromatogram of volatile aromatic compounds in Muscat Hamburg grape brandy with the addition of pectolytic enzyme – MHV1

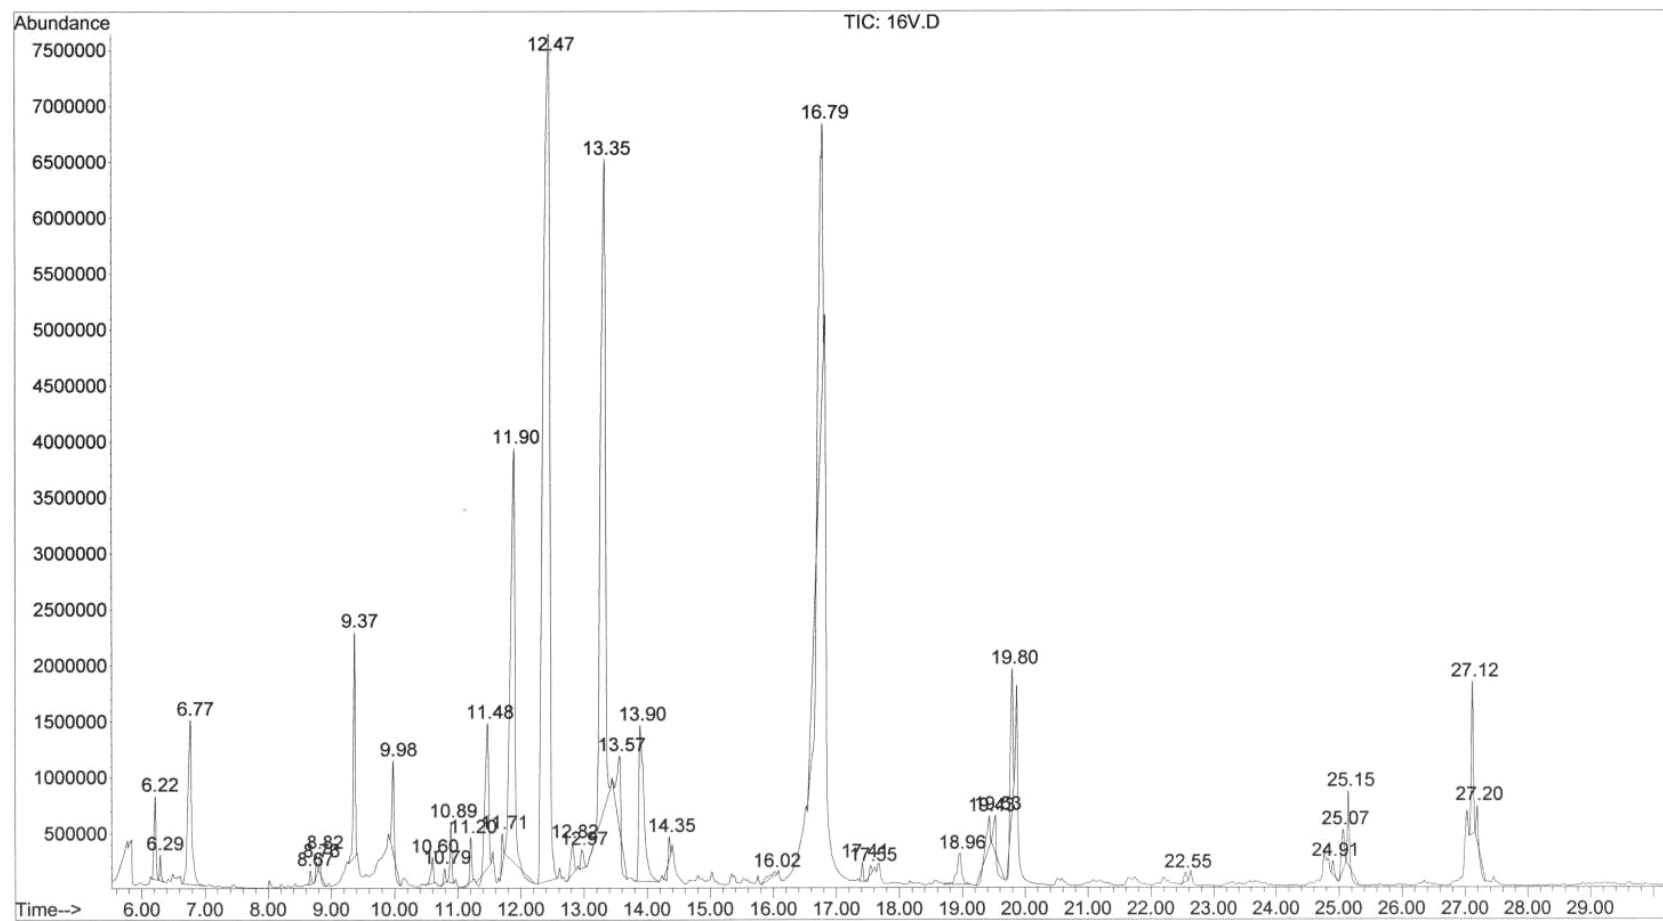

**Figure S18.** Chromatogram of volatile aromatic compounds in Muscat Hamburg grape brandy with the addition of pectolytic enzyme – MHV2

## References

23. Peinado, R.A.; Mauricio, J.C.; Moreno, J. Aromatic series in sherry wines with gluconic acid subjected to different biological aging conditions by *Saccharomyces cerevisiae* var. *capensis*. *Food Chem.* **2006**, *94*, 232–239.
24. Mahattanatawee, K.; Perez-Cacho, P.R.; Davenport, T.; Rouseff, R. Comparison of three lychee cultivar odor profiles using gas chromatography-olfactometry and gas chromatography-sulfur detection. *J. Agric. Food Chem.* **2007**, *55*, 1939–1944.
25. Peinado, R.A.; Moreno, J.; Bueno, J.E.; Moreno, J.A.; Mauricio, J.C.; Comparative study of aromatic compounds in two young white wines subjected to pre-fermentative cryomaceration. *Food Chem.* **2004**, *84*, 585–590.
27. Genovese, A.; Lamorte, S.A.; Gambuti, A.; Moio, L. Aroma of Aglianico and Uva di Troia grapes by aromatic series. *Food Res. Int.* **2013**, *53*, 15–23.
29. Garcia-Carpintero, E.G.; Sanchez-Palomo, E.; Gomez Gallego, M.A.; Gonzalez-Vinas, M.A. Effect of cofermentation of grape varieties on aroma profiles of La Mancha red wines. *J. Food Sci.* **2011**, *76*, C1169–C1180.
31. Qian, M.C.; Wang, Y. Seasonal variation of volatile composition and odor activity value of ‘Marion’ (*Rubus spp. hyb*) and ‘Thornless Evergreen’ (*R. laciniatus* L.) blackberries. *J. Food Sci.* **2005**, *70*, C13–C20.
37. Wu, Y.; Zhu, B.; Tu, C.; Duan, C.; Pan, Q. Generation of volatile compounds in litchi wine during winemaking and short-term bottle storage. *J. Agric. Food Chem.* **2011**, *59*, 4923–4931.
40. García-Carpintero, E.G.; Sánchez-Palomo, E.; Gallego, M.A.G.; González-Viñas, M.A. Volatile and sensory characterization of red wines from cv. Moravia Agria minority grape variety cultivated in La Mancha region over five consecutive vintages. *Food Res. Int.* **2011**, *44*, 1549–1560.
41. Diéguez, C.S.; de la Peña, M.L.G.; Gómez F.E. Approaches to spirit aroma: contribution of some aromatic compounds to the primary aroma in samples of Orujo spirits. *J. Agr. Food Chem.* **2003**, *51*, 7385–7390. doi: 10.1021/jf0302916
